# Supplementary material
Source: publisher figshare collection journal article supplement (https://gsajournals.figshare.com/articles/dataset/_/8316881)
Supplement: Supplementary file 1 [file 1]

Archive with 8 entries (8 files):
- Table S1.txt
- Figure S5.pdf
- Figure S4.pdf
- Figure S3.pdf
- Figure S2.pdf
- Figure S1.pdf
- description.md
- raw_KEIO_data.zip
