# Supplementary material
Source: publisher figshare collection journal article supplement (https://gsajournals.figshare.com/articles/dataset/_/8316881)
Supplement: Supplementary file 1 [file 1 › description.md]

ARTICLE TITLE
Matrix linear models for high-throughput chemical genetic screens

MANUSCRIPT #
GENETICS/2019/302299

ARTICLE DOI
10.1534/genetics.118.301785

Category: Bacteriology

Keywords: chemical genetic screen; E. coli; statistical methods and models; high-throughput experiments

License: CC BY 4.0


Description:

- raw_KEIO_data.zip contains the high throughput chemical genetic
  screen used in Kritikos et. al. (2017) and based on experiments
  reported by Nichols et. al. (2011).
- Figure S1 contains ROC curves comparing MLM to S scores applied to
  data simulated using frameworks of plates 2-5.
- Figure S2 contains ROC curves for plate 2-5 simulations comparing
  dosage-response encoded matrix linear models to categorically
  encoded S scores.
- Figure S3 contains plotted distributions of matrix linear model
  interaction estimates for auxotrophs identified by Joyce et al. over
  minimal media conditions.
- Figure S4 contains the ROC curve for the auxotrophs we empirically
  identified, compared against those identified by Joyce et al. as the
  reference.
- Figure S5 contains a comparison of the proportion of significant
  interactions detected when encoding for dosage response and when
  encoding dosage-condition combinations categorically, for plates
  2-5.
- Table S1 contains AUCs for dosage-response simulations based on
  plates 2-5.

A Julia language implementation of matrix linear models is available
at https://github.com/janewliang/GeneticScreen.jl

The code used for the data analysis in this paper can be found at
https://bitbucket.org/jwliang/mlm_gs_supplement
