# Supplementary material
Source: publisher figshare collection journal article supplement (https://gsajournals.figshare.com/articles/dataset/_/8316881)
Supplement: Supplementary file 1 [file 1 › Figure S1.pdf]

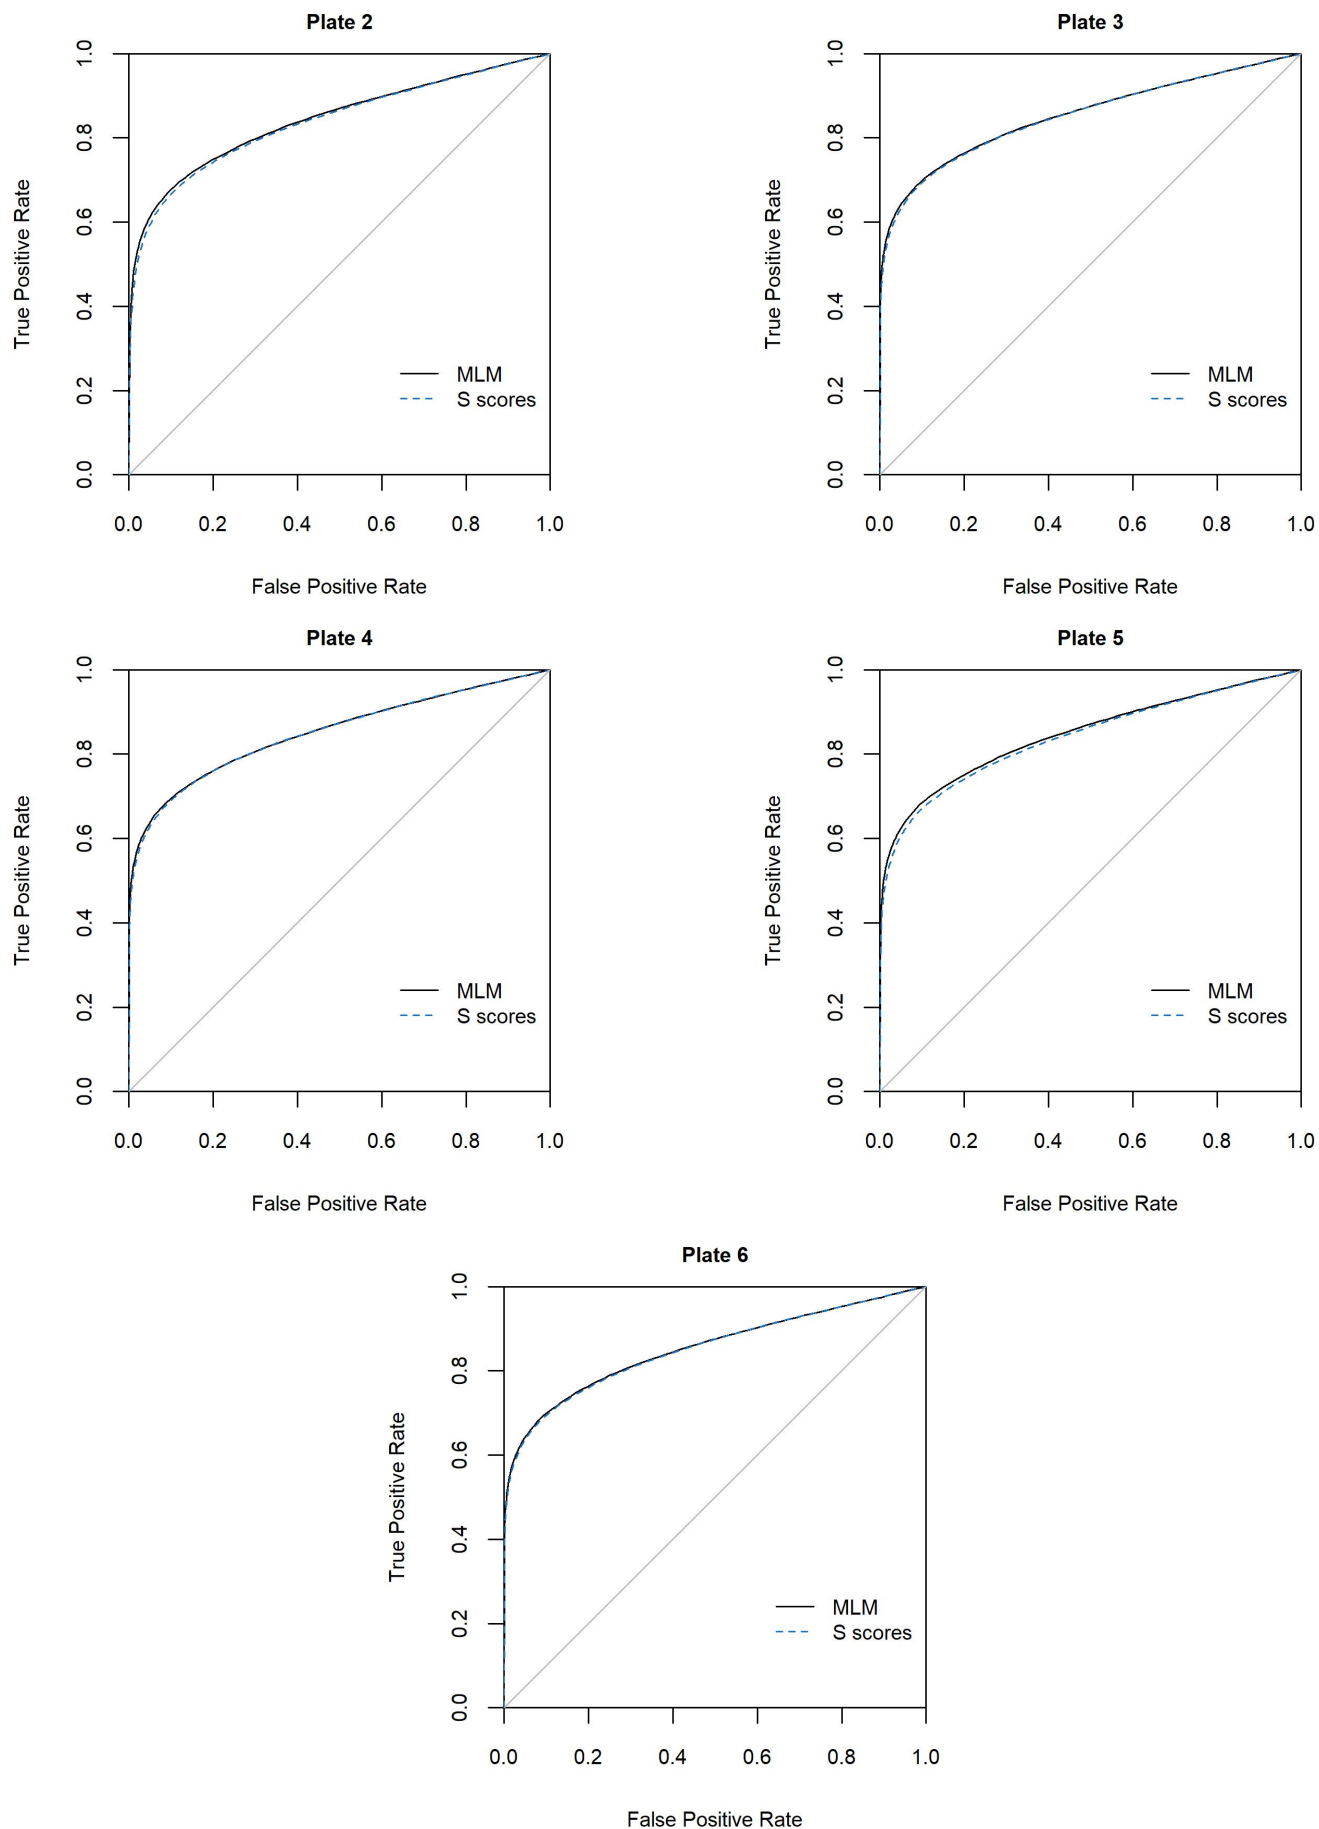

**Figure S1** ROC curves comparing MLM to *S* scores applied to data simulated using frameworks of plates 2-5. Interactions corresponding to adaptive Benjamini-Hochberg adjusted p-values below a given cutoff are considered significant; these results are compared to the simulated interactions. Curves were generated by plotting the TPRs and FPRs at varying p-value cutoffs.
