# Supplementary material
Source: publisher figshare collection journal article supplement (https://gsajournals.figshare.com/articles/dataset/_/8316881)
Supplement: Supplementary file 1 [file 1 › Figure S2.pdf]

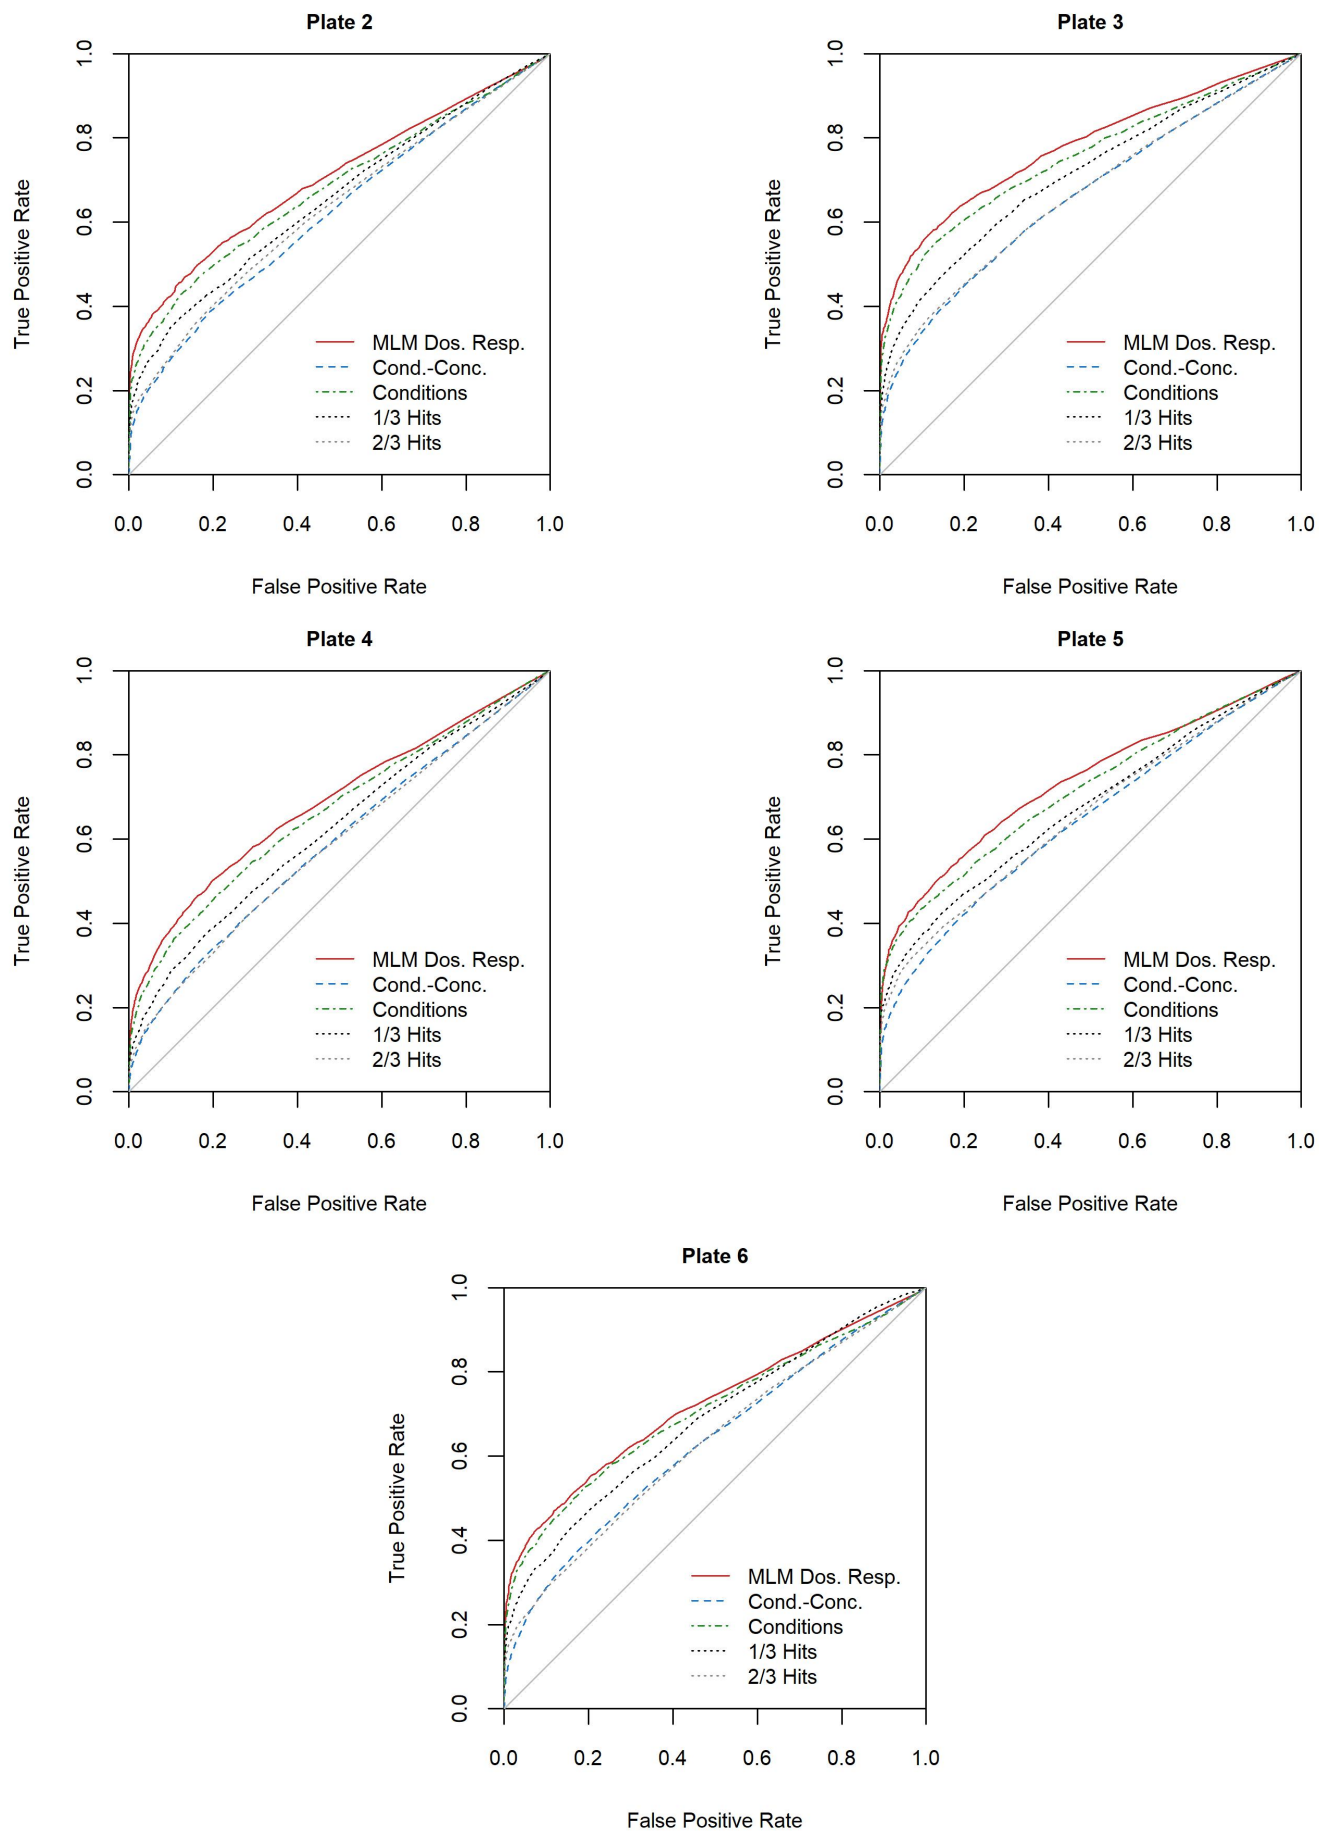

**Figure S2 ROC curves for plate 2-5 simulations comparing dosage-response encoded matrix linear models to categorically encoded  $S$  scores.** Dosage-response encoded matrix linear models outperform all other methods shown. These include  $S$  scores for data encoded with categorical condition-dosage combinations, for any of the three representations (Cond.-Conc, 1/3 Hits, and 2/3 Hits), as well as  $S$  scores for data encoded with just the conditions.
