# Supplementary material
Source: publisher figshare collection journal article supplement (https://gsajournals.figshare.com/articles/dataset/_/8316881)
Supplement: Supplementary file 1 [file 1 › Figure S3.pdf]

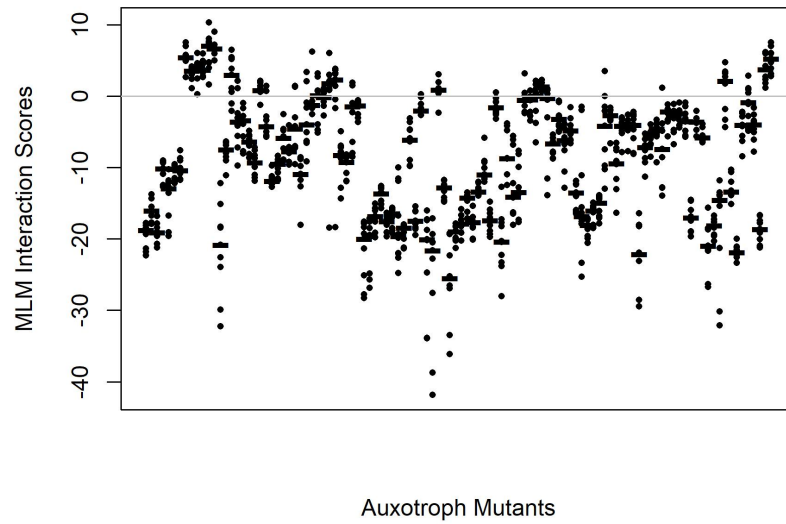

**Figure S3 Distributions of matrix linear model interaction estimates for auxotrophs identified by Joyce et al. over minimal media conditions.** The Joyce et al. auxotrophs are plotted along the horizontal axis. The MLM interactions between the auxotrophs and minimal media conditions are plotted along the vertical axis, with the horizontal bars indicating the median value. Most interactions fall below zero, indicating little growth.
