# Supplementary material
Source: publisher figshare collection journal article supplement (https://gsajournals.figshare.com/articles/dataset/_/8316881)
Supplement: Supplementary file 1 [file 1 › Figure S4.pdf]

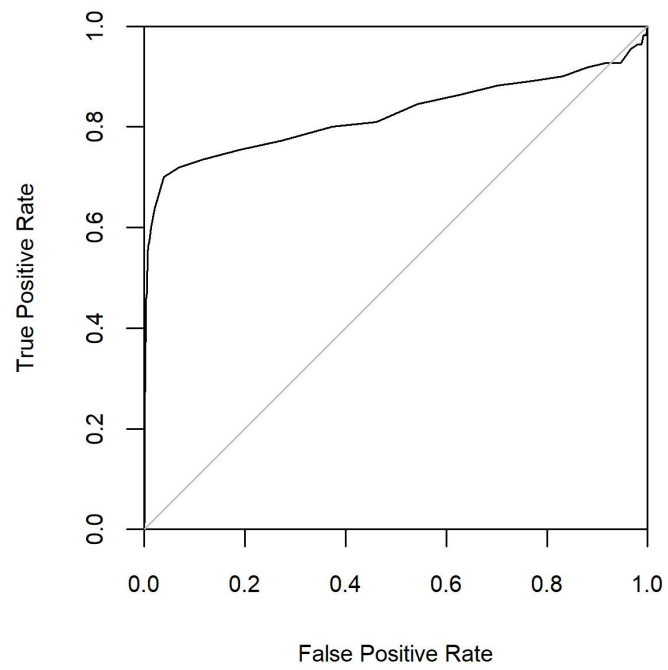

**Figure S4** ROC curve for the auxotrophs we empirically identified, compared against those identified by Joyce et al. as the reference. TPRs and FPRs were calculated based on the median minimal media interaction score for the each of the auxotrophs we identified, at varying cutoffs. The AUC was 0.824.
