# Supplementary material
Source: publisher figshare collection journal article supplement (https://gsajournals.figshare.com/articles/dataset/_/8316881)
Supplement: Supplementary file 1 [file 1 › Figure S5.pdf]

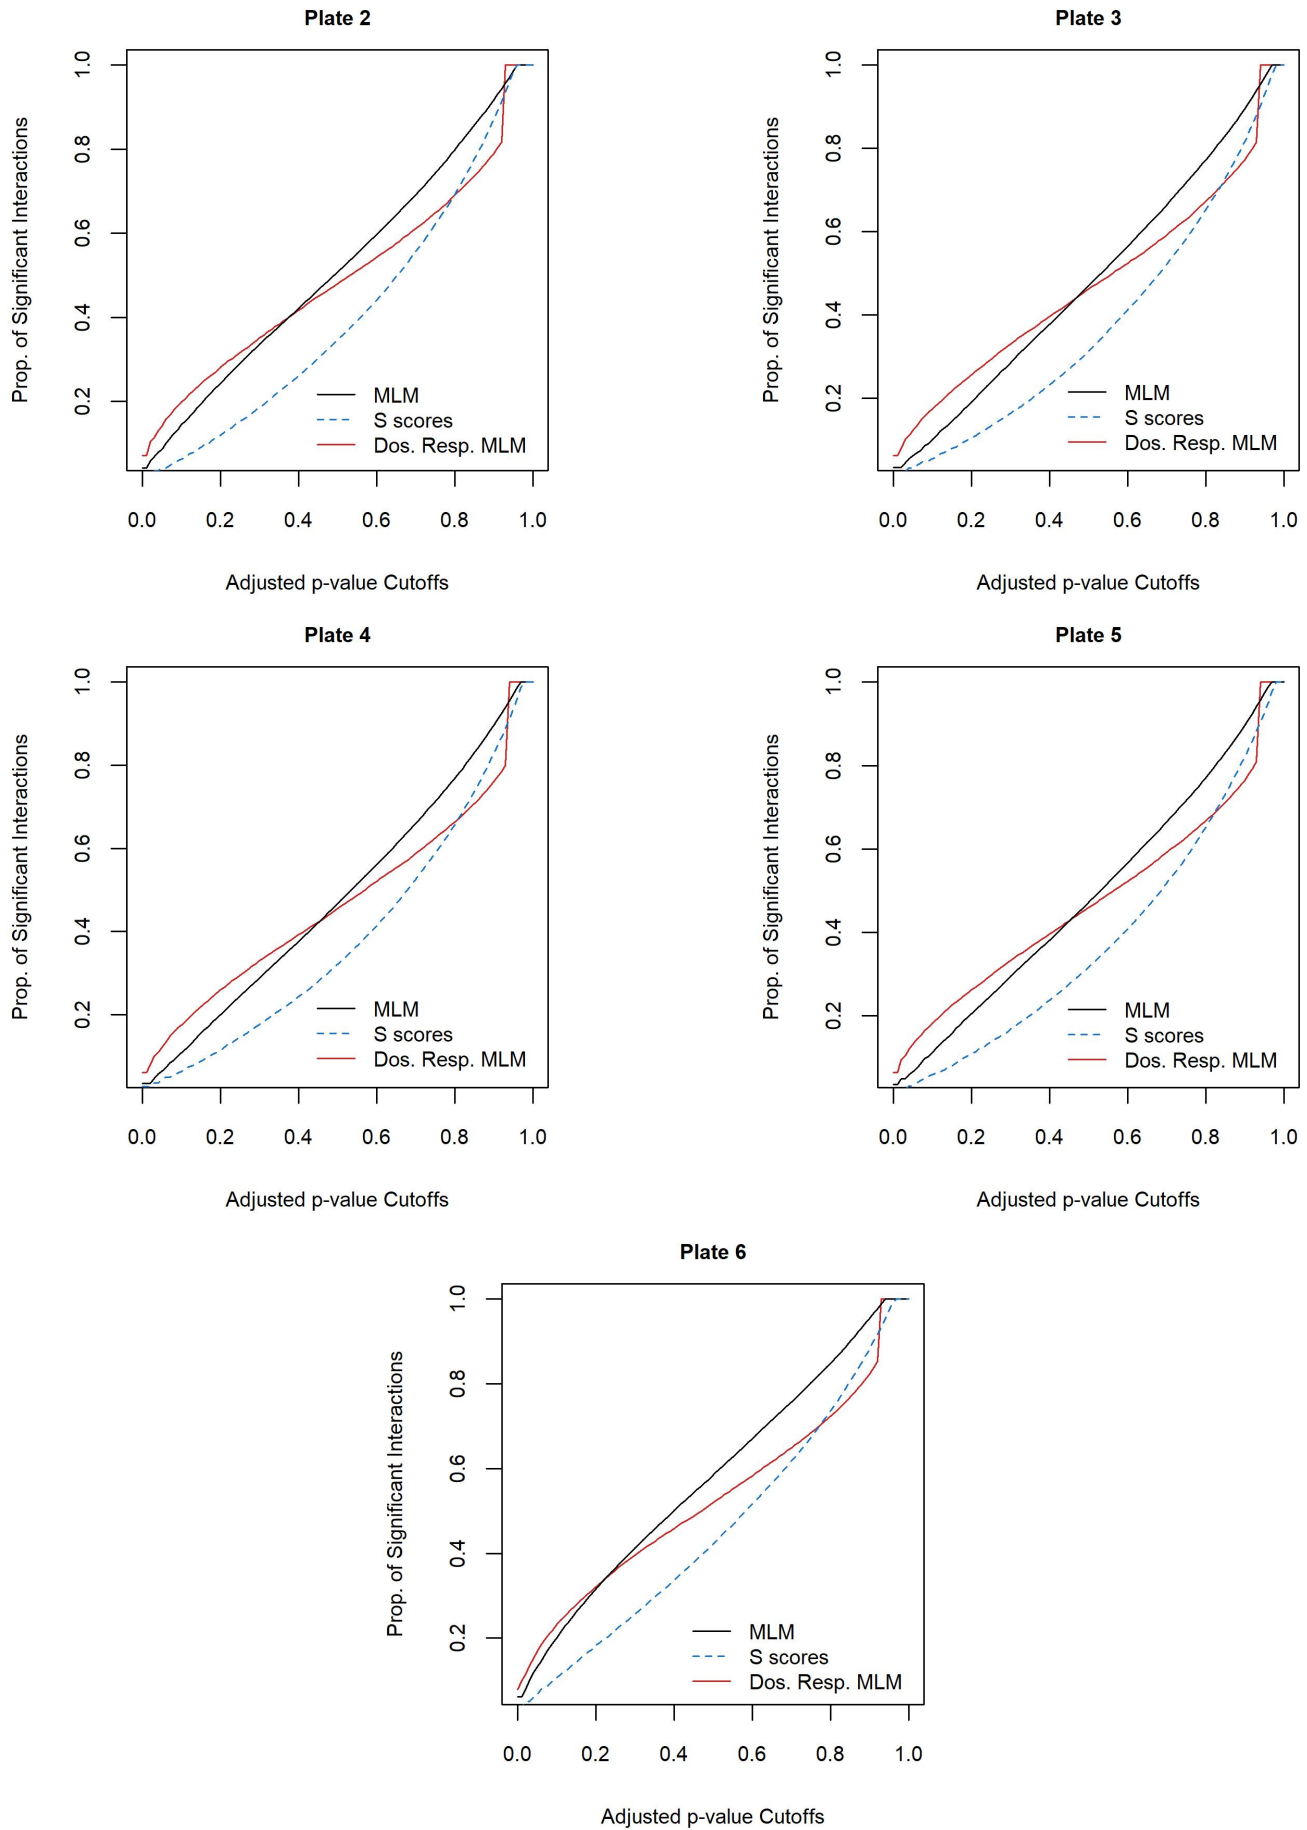

**Figure S5** Comparing the proportion of significant interactions detected when encoding for dosage response and when encoding dosage-condition combinations categorically, for plates 2-5. The former is only possible in matrix linear models. The latter is shown for both matrix linear models and *S* scores. The curves were generated by obtaining the adaptive Benjamini-Hochberg adjusted p-values from permutation tests for each method and identifying the proportion of adjusted p-values below varying cutoffs.
