# Supplementary material
Source: publisher figshare collection journal article supplement (https://gsajournals.figshare.com/articles/dataset/_/8316881)
Supplement: Supplementary file 1 [file 1 › Table S1.txt]

# Table S1: AUCs for dosage-response simulations based on plates 2-5. Dosage-response encoded matrix linear models outperform all other methods shown within each plate. These include S scores for data encoded with categorical condition-dosage combinations, for any of the three representations (Cond.-Conc, 1/3 Hits, and 2/3 Hits), as well as S scores for data encoded with just the conditions.
	Plate 1	Plate 2	Plate 3	Plate 4	Plate 5	Plate 6
MLM Dos. Resp.	0.714	0.707	0.779	0.688	0.736	0.72
Cond.-Conc.	0.612	0.623	0.663	0.591	0.644	0.632
Conditions	0.694	0.683	0.753	0.666	0.713	0.705
1/3 Hits	0.65	0.657	0.713	0.625	0.673	0.683
2/3 Hits	0.612	0.634	0.666	0.588	0.655	0.63
